# Supplementary material for: Age and growth of chum salmon from the Tumen River
Source: PeerJ. 2025 Aug 28;13:e19902. doi: 10.7717/peerj.19902 (PMC12399085; doi:10.7717/peerj.19902)
Supplement: Supplemental Information 1 [file peerj-13-19902-s001.xlsx]

## Sheet: Sheet1
FL/cm	BW/g	Age
62	2600	2+
59.7	2290	2+
69.1	3400	2+
65.8	2770	2+
61.7	2480	2+
60.4	2400	2+
64.3	2890	2+
62.3	2440	2+
61.8	2610	2+
56.8	2060	2+
57.8	2270	2+
61.2	2170	2+
62.3	2350	2+
58.2	1890	2+
62.3	2730	2+
58.2	1930	2+
62.4	2180	2+
57.6	1910	2+
64.8	3000	2+
66.1	3200	2+
59.6	2400	2+
60.5	2350	2+
61.2	2470	2+
63.1	2780	2+
58.3	1860	2+
67.1	3140	2+
62.1	2480	2+
60.5	2360	2+
57.8	1920	2+
59.6	2080	2+
57.5	2060	2+
59.2	1820	2+
61.4	2320	2+
55.6	1870	2+
55.8	1920	2+
58.3	2520	2+
65.4	3130	2+
59.3	2590	2+
60.3	2340	2+
69.1	3350	2+
54.3	2450	2+
68.2	3470	2+
60.8	2310	2+
67.8	3990	2+
62.3	2500	2+
64.6	2990	2+
63.3	2400	2+
58.2	1970	2+
60.3	2130	2+
64.5	2690	2+
64.2	2300	2+
58.9	2250	2+
58.1	1900	2+
67.8	3050	2+
56.3	1690	2+
61.2	2340	2+
62.2	2510	2+
61.8	2140	2+
61.9	2450	2+
60.1	2180	2+
63.7	2530	2+
61.2	2250	2+
62.1	2960	2+
62	2580	2+
64.3	3030	2+
63.9	2880	2+
61.7	2530	2+
64.2	2540	2+
63.3	2810	2+
61.8	2620	2+
58.3	1980	2+
56	1780	2+
57	1760	2+
58	2900	2+
61	2520	2+
56	1800	2+
58	1900	2+
62	2390	2+
59	2090	2+
55	1600	2+
57	1940	2+
56	1600	2+
62	2290	2+
60	2200	2+
62	2800	2+
70	3700	2+
59	2140	2+
63	2400	2+
54	1940	2+
61	2160	2+
57	1700	2+
60	3100	2+
58	1930	2+
55	1950	2+
57	2500	2+
62	2290	2+
55	2100	2+
56	1720	2+
62	2480	2+
62	2100	2+
60	2300	2+
63	2520	2+
59	2290	2+
58	1990	2+
58	2150	2+
61	2350	3+
66.4	2790	3+
66.6	3050	3+
63.3	2870	3+
66.4	3260	3+
66.1	3350	3+
67.5	3410	3+
66.2	2910	3+
70.6	3560	3+
61.9	2190	3+
62.9	2680	3+
64.9	2890	3+
65.8	2970	3+
63.6	2850	3+
62.9	2680	3+
60.8	2200	3+
61.7	2320	3+
68.9	3370	3+
66.8	3170	3+
65.8	3040	3+
63.4	3080	3+
62.1	2370	3+
69.9	3460	3+
60.7	2470	3+
64.1	2790	3+
64.2	3290	3+
63.2	2870	3+
59.7	2590	3+
61.5	2430	3+
57.8	2260	3+
67.3	3540	3+
62.1	2620	3+
58.7	2190	3+
66.1	3350	3+
68.2	3660	3+
61.3	2290	3+
59.8	1890	3+
63.2	2490	3+
63.5	2900	3+
65.8	3250	3+
67.5	2710	3+
65.4	2840	3+
57.6	2060	3+
67.5	3480	3+
62.1	2510	3+
61.2	2310	3+
62.3	2710	3+
59.4	2070	3+
69.8	2830	3+
67.1	3130	3+
65.1	3150	3+
64.1	2550	3+
63.4	2690	3+
59.1	2280	3+
66.2	3540	3+
64.8	3330	3+
66.8	3350	3+
63.9	2750	3+
69.2	3350	3+
64.9	2870	3+
60.8	2190	3+
63.4	3110	3+
53.9	1680	3+
61.4	2360	3+
55.4	1940	3+
58.2	2280	3+
54.1	2000	3+
59.8	1600	3+
60.3	1900	3+
57.9	1680	3+
61.1	2540	3+
59.4	2280	3+
58.3	2080	3+
60.3	2700	3+
66.4	3180	3+
64.5	3310	3+
59.4	1960	3+
64.8	3490	3+
60.9	2160	3+
66.2	2980	3+
56.7	1990	3+
61	2230	3+
60.2	2570	3+
66.3	3170	3+
70.1	3900	3+
62.6	2600	3+
61.4	2660	3+
58.2	1750	3+
64.1	2430	3+
65.6	2900	3+
64.7	3100	3+
64.2	2290	3+
65.9	3710	3+
65.1	3330	3+
66.9	3010	3+
67.1	3260	3+
62.2	2130	3+
66.7	2990	3+
64.1	2220	3+
63.2	2360	3+
62.3	2200	3+
64.7	2500	3+
63.8	2570	3+
72.2	2990	3+
63.1	2510	3+
63.2	2730	3+
62.2	2330	3+
63.3	2610	3+
64.8	2350	3+
61.2	2360	3+
66.8	2770	3+
59.2	1770	3+
63.1	2640	3+
58.3	2120	3+
60.4	2240	3+
64.3	2340	3+
61.6	2390	3+
61.9	2370	3+
60.4	2040	3+
64.8	2640	3+
61.1	2200	3+
63.4	2400	3+
70	3700	3+
62	2240	3+
65	2490	3+
68.9	3550	4+
63.1	2740	4+
64.9	2590	4+
66.1	3270	4+
67.2	3120	4+
70.3	3400	4+
67.9	2900	4+
64.3	2030	4+
66.7	2510	4+
65	2580	4+
70	4020	5+
59.9	2220	2+
57.2	1840	2+
59.8	2290	2+
57.3	1940	2+
60.7	2560	2+
64.8	2930	2+
56.9	2100	2+
65.9	3340	2+
54.6	1660	2+
54.7	1640	2+
60.7	2400	2+
54.9	1700	2+
55.2	1600	2+
64.5	3460	2+
61.5	2420	2+
61.9	2600	2+
58.4	1800	2+
56.1	1700	2+
57.2	2080	2+
64.9	3180	2+
54.8	1880	2+
60.2	2520	2+
57.6	1820	2+
58.1	2160	2+
61.2	2140	2+
60.3	2120	2+
67.1	3310	2+
60.7	2410	2+
62	2300	2+
55	1900	2+
68	2800	2+
70	3000	2+
53	1560	2+
53	1560	2+
51	1400	2+
57	1800	2+
55	1600	2+
67	2750	2+
52	1500	2+
62	2300	2+
55	2200	2+
54.5	2000	2+
52	1600	2+
59.5	2200	2+
52	1400	2+
64	3000	2+
52	1500	2+
60	2500	2+
58	2000	2+
55.1	1900	2+
52.2	1850	2+
61.8	2220	3+
61.5	2280	3+
58.5	2070	3+
57.9	1920	3+
65.1	2820	3+
57.2	1800	3+
61.3	2520	3+
57.3	1860	3+
62.4	2620	3+
61.8	2720	3+
59.7	2200	3+
56.7	1880	3+
65.1	2740	3+
67.9	3880	3+
56.1	1860	3+
64.9	2820	3+
62.1	2680	3+
62.4	2780	3+
65.1	3180	3+
57.3	2160	3+
66.1	2620	3+
72.6	4600	3+
65	2870	3+
70.6	3500	3+
68	2700	3+
72	3750	3+
55	2400	3+
61	2700	3+
61	3100	3+
62	2700	3+
64	2750	3+
56.5	1900	3+
68	3500	3+
59	1750	3+
57.5	2250	3+
68.5	3000	3+
62.5	2500	3+
63	2650	3+
74.6	5200	4+
